# Supplementary material for: Printed Composite Film with Microporous/Micropyramid Hybrid Conductive Architecture for Multifunctional Flexible Force Sensors
Source: MDPI journal article supplement (doi:10.3390/nano14010063), 2023-12-25
Supplement: s1 [file s1]

## **Supporting Information**

# **Printed Composite Film with Microporous/Micropyramid Hybrid Conductive Architecture for Multifunctional Flexible Force Sensors**

**Yi-Fei Wang <sup>\*</sup>, Junya Yoshida, Yasunori Takeda, Ayako Yoshida, Takeru Kaneko, Tomohito Sekine, Daisuke Kumaki and Shizuo Tokito <sup>\*</sup>**

Research Center for Organic Electronics (ROEL), Yamagata University, 4-3-16, Jonan, Yonezawa 992-8510, Yamagata, Japan; tww84653@st.yamagata-u.ac.jp (J.Y.); y.takeda@yz.yamagata-u.ac.jp (Y.T.); ayako\_yoshida@yz.yamagata-u.ac.jp (A.Y.); t221438m@st.yamagata-u.ac.jp (T.K.); tomohito@yz.yamagata-u.ac.jp (T.S.); d\_kumaki@yz.yamagata-u.ac.jp (D.K.)

<sup>\*</sup> Correspondence: wang@yz.yamagata-u.ac.jp (Y.-F.W.); tokito@yz.yamagata-u.ac.jp (S.T.)

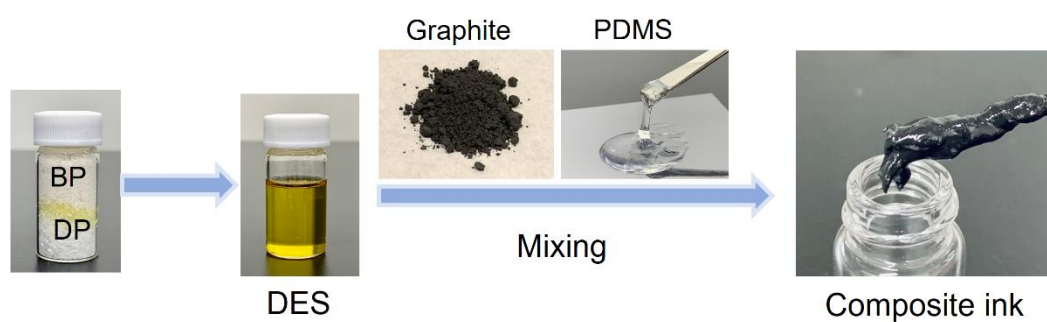

**Figure S1.** The synthesis process of the printed composite ink

**Table S1.** Component of the printable composite inks

| Inks  | PDMS (g) | DES (g) | Graphite (g) |
|-------|----------|---------|--------------|
| Ink-0 | 1        | 0       | 1.25         |
| Ink-1 | 1        | 1       | 0.5          |
| Ink-2 | 1        | 1       | 0.75         |
| Ink-3 | 1        | 1       | 1.0          |
| Ink-4 | 1        | 1       | 1.25         |
| Ink-5 | 1        | 1       | 1.37         |

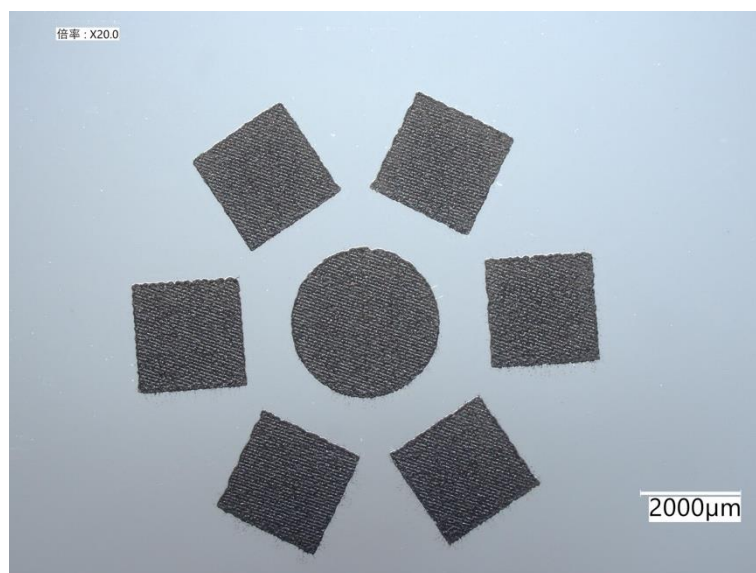

**Figure S2.** A printed sensing layer with pattern feature of 2 mm by 2 mm.

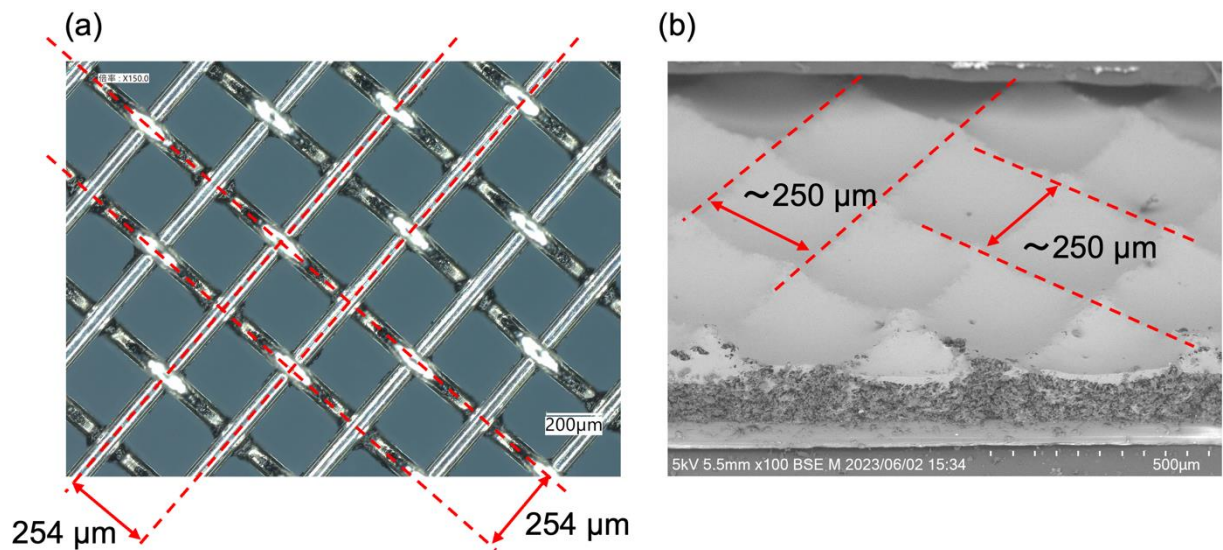

**Figure S3.** (a) Optical microscopy image of the screen mesh mask. (b) SEM image of the printed composite film. The pitch size ( $\sim 250 \mu\text{m}$ ) of the micropylamid structure in the composite film perfectly matches the line distance of the screen mesh.

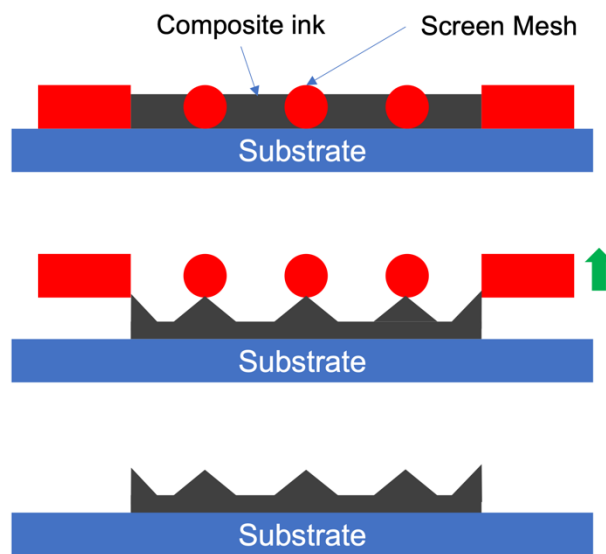

**Figure S4.** Illustration depicting the formation process of the micropylamid structure in the composite film (ink-4) using a screen mesh.

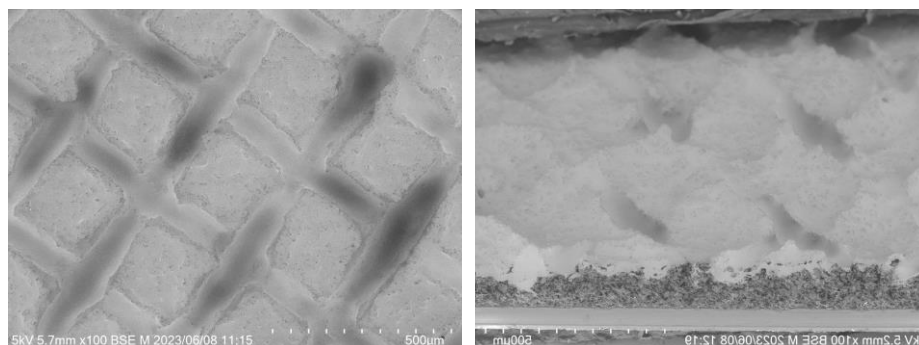

**Figure S5.** SEM images of Ink-5 with high loading of Graphite taken from the surface (left) and a 45-degree observation angle (right).

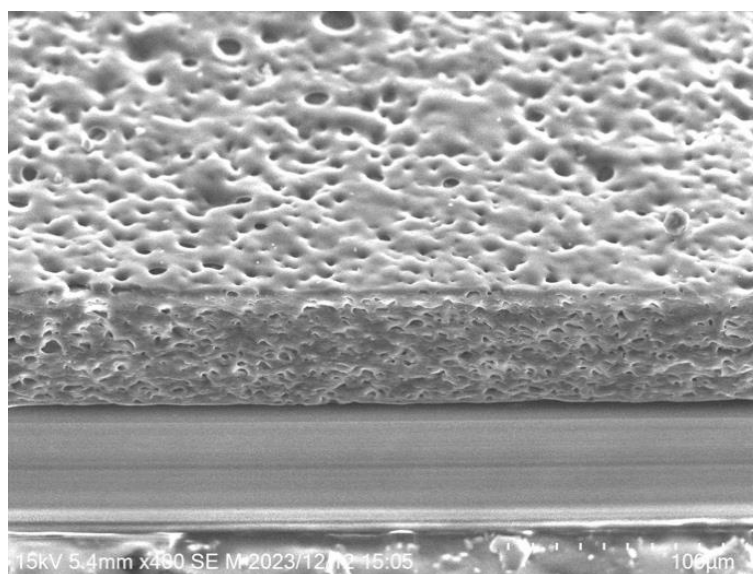

**Figure S6.** SEM image at a 45-degree observation angle of printed film without loading of graphite.

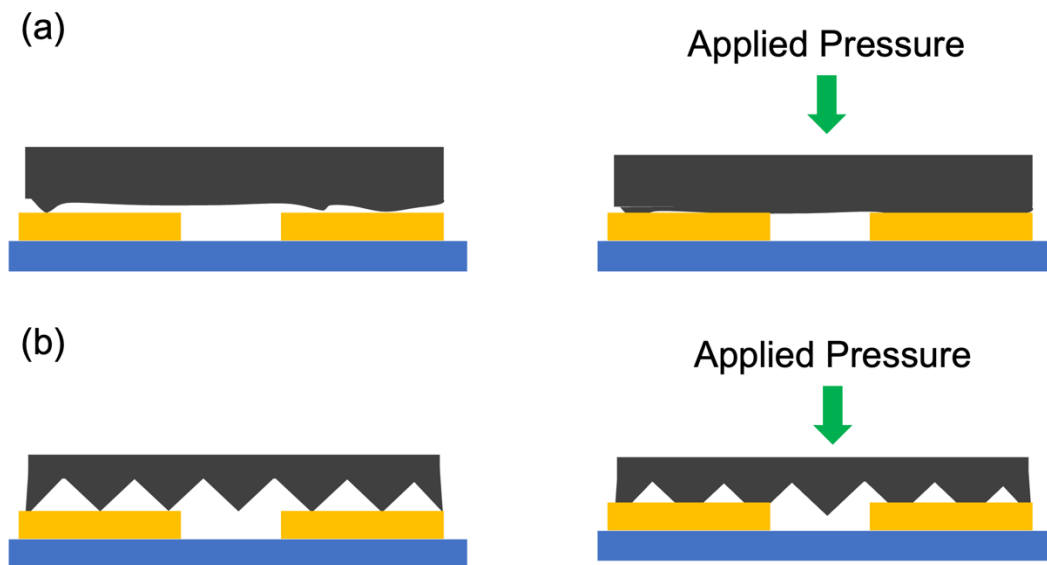

**Figure S7:** illustration of contact point changes of different composite film. (a) relative flat composite film by ink-2 and ink-3. (b) micropyramid composite film by ink 4. Despite the relatively flat nature of the film, subtle raised structures are present in these printed films, hindering full contact between the film and the electrode. This results in fewer contact points when compared to films with micropyramid surface structures, such as Ink-4. Consequently, sensors based on Ink-2 and Ink-3 exhibit a larger initial resistance. However, when pressure is applied, these films quickly achieve large-area contact between the sensing layer and the electrodes, leading to a rapid change in resistance. This phenomenon explains why Ink-2 and Ink-3 demonstrate greater resistance drop compared to Ink-4 in the small pressure region.

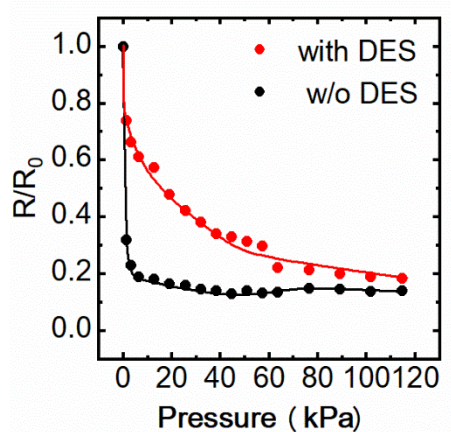

**Figure S8.** Comparison of performance of inks with DES (ink-4) and without DES (ink-0).

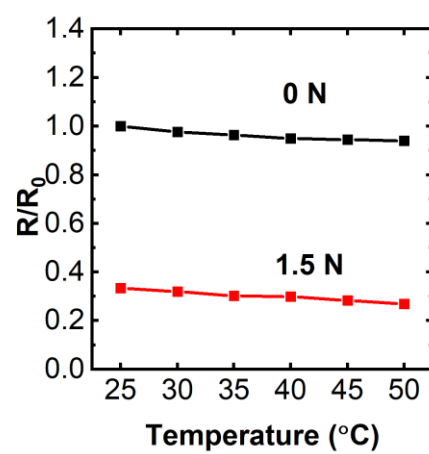

**Figure S9.** Impact of temperature on the pressure response of the sensor.

**Table S2.** Comparative analysis of the printed pressure sensor in the present study with previously reported resistive-type pressure sensors.

| Materials     | Device type  | Process                                                                                                                                                                                             | Sensitivity (Work Range)                                                                                             | Reference                                         |
|---------------|--------------|-----------------------------------------------------------------------------------------------------------------------------------------------------------------------------------------------------|----------------------------------------------------------------------------------------------------------------------|---------------------------------------------------|
| PDMS/Graphite | hybrid       | 1. One step ink mixing<br>2. One step screen-printing<br>3. Device assembly                                                                                                                         | 0.15 kPa <sup>-1</sup> (0-2.2 kPa)<br>0.01 kPa <sup>-1</sup> (2.2-31.8 kPa)<br>0.003 kPa <sup>-1</sup> (31.8-60 kPa) | Our work                                          |
| TPU/SWCNT     | micropattern | 1. Spray coating SWCNT on TPU<br>2. Micropatterning TPU on a master mold by hot air blow<br>3. Face to face assembly                                                                                | 0.02 kPa <sup>-1</sup> (0-20 kPa)<br>0.0007 kPa <sup>-1</sup> (20-200 kPa)                                           | Chemical engineer journal 407(2021) 127960        |
| GO/sandpaper  | micropattern | 1. Coating PDMS on sandpaper and peeling<br>2. Coating GO<br>3. GO reduction<br>4. Face to face package                                                                                             | 0.25 kPa <sup>-1</sup> (0-2.6 kPa)<br>0.0045 kPa <sup>-1</sup> (2.6-40 kPa)                                          | ACS Nano 2018, 12, 3, 2346–2354                   |
| TPU/WCNT      | micropattern | 1. Electrospinning TPU fibrous network<br>2. Dipping in MWCNT solution with sonication<br>3. Device assembly                                                                                        | 2 kPa <sup>-1</sup> (0-0.2 kPa)<br>0.5 kPa <sup>-1</sup> (0.2-1 kPa)<br>0.02 kPa <sup>-1</sup> (1-10 kPa)            | Composite science and technology 203(2021) 108617 |
| AgNW          | micropattern | 1. Microwrinkle PDMS master mold by prestretching and UVO treatment<br>2. Coating PDMS and peeling off<br>3. AgNW spray coating<br>4. Device assembly                                               | 0.06 kPa <sup>-1</sup> (0-2 kPa)<br>0.006 kPa <sup>-1</sup> (2-8 kPa)                                                | Measurement 201(2022)111645                       |
| PEDOT:PSS     | micropattern | 1. making PEDOT:PSS/graphene hybrid ink<br>2. aerosol jet printing micropattern on IDE electrode<br>3. spray coating MWCNT on sandpaper<br>4. coating ecoflex and peeling off<br>5. assembly device | 0.203 kPa <sup>-1</sup> (1-4 kPa)<br>0.01 kPa <sup>-1</sup> (4-20 kPa)                                               | J. Mater. Chem. C, 2023,11, 13324-13334           |

|                                             |              |                                                                                                                                                                                                                                   |                                                                                                                       |                                              |
|---------------------------------------------|--------------|-----------------------------------------------------------------------------------------------------------------------------------------------------------------------------------------------------------------------------------|-----------------------------------------------------------------------------------------------------------------------|----------------------------------------------|
| PDDA/MWCNT                                  | micropattern | 1. Master mold by photolithography and etching.<br>2. Micropatterned PDMS by micromolding<br>3. Rinsing in etOH and surface treatment<br>4. Rinse in PDDA and PSS<br>5. 15 times rinsing in PDDA and MWCNTs<br>6. Device assembly | 2.65 kPa <sup>-1</sup> (0-0.3 kPa)                                                                                    | Sensors 2019, 19, 4985                       |
| CNT-Coated PDMS sponge                      | microporous  | 1) Immerse cubic sugar in PDMS;<br>2) Cut and remove sugar by water to achieve PDMS sponge;<br>3) Immerse PDMS sponge in CNT solution;<br>4) Attach on copper electrode by conductive adhesive                                    | 0.02 kPa <sup>-1</sup> (P < 100 kPa)<br>0.01 kPa <sup>-1</sup> (100-1200 kPa)                                         | ACS Appl. Mater. Interfaces 2019, 11, 23639. |
| Cross-linked PVDF-HFP/fluorosurfactant foam | microporous  | 1) self-foaming in a glass mold;<br>2) cut and attach on 3D electrode pattern                                                                                                                                                     | 0.0982 kPa <sup>-1</sup> (P < 10 kPa)<br>0.005 kPa <sup>-1</sup> (10-20 kPa)<br>0.0025 kPa <sup>-1</sup> (20-100 kPa) | Nat. Commun. 2020, 11, 5747.                 |
| PANIH/C-RGO@PU sponge                       | microporous  | 1) immerse melamine sponge in GO and reduction;<br>2) immerse in PANI precursors and reaction<br>3) coat conductive paste dot                                                                                                     | 0.0021 kPa <sup>-1</sup> (0-2.3 kPa)<br>0.0109 kPa <sup>-1</sup> (2.3-25 kPa)                                         | Small 2018, 14, 1803018.                     |
| Sugar-templated CNT-PDMS sponge             | microporous  | 1) infiltrate PDMS in cubic sugar;<br>2) dissolve sugar by hot water to achieve PDMS sponge;<br>3) repeating drop/dry CNT solution into PDMS sponge<br>4) attach PET/ITO substrate as electrode                                   | 0.033 kPa <sup>-1</sup> (0-15 kPa)<br>0.008 kPa <sup>-1</sup> (15 kPa-50 kPa)                                         | Small 2017, 13, 1702091.                     |



|                                   |             |                                                                                                                                     |                                                                               |                              |
|-----------------------------------|-------------|-------------------------------------------------------------------------------------------------------------------------------------|-------------------------------------------------------------------------------|------------------------------|
| rGO/Polyaniline<br>Wrapped Sponge | microporous | 1) immerge melamine<br>sponge in GO and<br>reduction;<br>2) immerge in PANI<br>precursors and reaction<br>3) smear conductive paste | 0.152 kPa <sup>-1</sup> (0- 3.24 kPa)<br>0.0049 kPa <sup>-1</sup> (12-27 kPa) | Nanoscale 2018, 10,<br>10033 |
|-----------------------------------|-------------|-------------------------------------------------------------------------------------------------------------------------------------|-------------------------------------------------------------------------------|------------------------------|
